# Supplementary material
Source: MDPI journal article supplement (https://www.mdpi.com/2571-8789/8/1/9)
Supplement: s1 [file s1]

Table S2. Tukey multiple comparisons of means (95% family-wise confidence level) based on ANOVA results of the abundance of bacteria and archaea estimated by quantitative PCR. Significantly different samples (with p-value < 0.05) are marked by bold. Significant codes are analogous to Table S1.

| BACTERIA                              |           |          |          |         |              |              |         |          |
|---------------------------------------|-----------|----------|----------|---------|--------------|--------------|---------|----------|
|                                       | Df        | Sum_Sq   | Mean_Sq  | F_value | Pr(>F)       | significance |         |          |
| Sample                                | 20        | 2.70E+20 | 1.35E+19 | 30.17   | <2e-16       | ***          |         |          |
| Residuals                             | 94        | 4.21E+19 | 4.48E+17 |         |              |              |         |          |
| ARCHAEA                               |           |          |          |         |              |              |         |          |
| Sample                                | 20        | 2.67E+14 | 1.34E+13 | 11.35   | <2e-16       | ***          |         |          |
| Residuals                             | 94        | 1.11E+14 | 1.18E+12 |         |              |              |         |          |
| Signif.codes:                         |           |          |          |         |              |              |         |          |
| 0_***_0.001_**_0.01_*_0.05_._0.1_''_1 |           |          |          |         |              |              |         |          |
| BACTERIA                              |           |          |          |         | ARCHAEA      |              |         |          |
|                                       | diff      | lwr      | upr      | p       | significance | significance |         |          |
| M1.C4-M1.C1                           | -2.00E+05 | -1.6E+09 | 1.56E+09 | 1       | 19420        | -2501090     | 2539930 | 1        |
| M2.AY-M1.C1                           | 1.26E+07  | -1.5E+09 | 1.57E+09 | 1       | 840220       | -1680290     | 3360730 | 0.999673 |
| M2.BF-M1.C1                           | 5.12E+06  | -1.6E+09 | 1.56E+09 | 1       | 420420       | -2100090     | 2940930 | 1        |
| M2.C-M1.C1                            | 1.58E+06  | -1.3E+09 | 1.35E+09 | 1       | 111120       | -2071706     | 2293946 | 1        |
| M3.BC-M1.C1                           | 4.41E+06  | -1.6E+09 | 1.56E+09 | 1       | 147420       | -2373090     | 2667930 | 1        |
| M3.BF-M1.C1                           | 9.12E+06  | -1.3E+09 | 1.36E+09 | 1       | 619720       | -1563106     | 2802546 | 0.999971 |
| M3.C-M1.C1                            | 3.18E+06  | -1.6E+09 | 1.56E+09 | 1       | 73940        | -2446570     | 2594450 | 1        |
| M3.E-M1.C1                            | 2.87E+07  | -1.5E+09 | 1.58E+09 | 1       | 116420       | -2404090     | 2636930 | 1        |
| M3.O-M1.C1                            | 2.66E+07  | -1.5E+09 | 1.58E+09 | 1       | 230220       | -2290290     | 2750730 | 1        |
| M4.BC-M1.C1                           | -1.18E+06 | -1.6E+09 | 1.55E+09 | 1       | -133780      | -2654290     | 2386730 | 1        |
| M4.BF-M1.C1                           | -1.81E+05 | -1.6E+09 | 1.56E+09 | 1       | 666220       | -1854290     | 3186730 | 0.999991 |
| M4.C-M1.C1                            | -1.18E+06 | -1.6E+09 | 1.55E+09 | 1       | 706220       | -1814290     | 3226730 | 0.999976 |

|                   |                 |                 |                 |                 |            |                |                 |                |                 |
|-------------------|-----------------|-----------------|-----------------|-----------------|------------|----------------|-----------------|----------------|-----------------|
| <b>M4.E-M1.C1</b> | <b>2.40E+09</b> | <b>8.42E+08</b> | <b>3.95E+09</b> | <b>3.15E-05</b> | <b>***</b> | 3166220        | 645710.1        | 5686730        | 0.002134        |
| <b>M4.O-M1.C1</b> | <b>3.00E+09</b> | <b>1.44E+09</b> | <b>4.55E+09</b> | <b>1E-07</b>    | <b>***</b> | <b>2066220</b> | <b>-454290</b>  | <b>4586730</b> | <b>0.263267</b> |
| M5.BC-M1.C1       | -9.81E+05       | -1.6E+09        | 1.55E+09        | 1               |            | 1666220        | -854290         | 4186730        | 0.662071        |
| M5.BF-M1.C1       | -5.81E+05       | -1.6E+09        | 1.55E+09        | 1               |            | 2866220        | 345710.1        | 5386730        | 0.010146        |
| <b>M5.E-M1.C1</b> | <b>2.50E+09</b> | <b>9.42E+08</b> | <b>4.05E+09</b> | <b>1.13E-05</b> | <b>***</b> | <b>1966220</b> | <b>-554290</b>  | <b>4486730</b> | <b>0.349437</b> |
| <b>M5.O-M1.C1</b> | <b>6.50E+09</b> | <b>4.94E+09</b> | <b>8.05E+09</b> | <b>0</b>        |            | 6666220        | 4145710         | 9186730        | 0               |
| M1.C3-M1.C2       | -8.20E+04       | -1.6E+09        | 1.56E+09        | 1               |            | <b>27200</b>   | <b>-2493310</b> | <b>2547710</b> | <b>1</b>        |
| M1.C4-M1.C2       | 8.30E+04        | -1.6E+09        | 1.56E+09        | 1               |            | 29000          | -2491510        | 2549510        | 1               |
| M2.AY-M1.C2       | 1.29E+07        | -1.5E+09        | 1.57E+09        | 1               |            | 849800         | -1670710        | 3370310        | 0.999616        |
| M2.BF-M1.C2       | 5.41E+06        | -1.6E+09        | 1.56E+09        | 1               |            | 430000         | -2090510        | 2950510        | 1               |
| M2.C-M1.C2        | 1.86E+06        | -1.3E+09        | 1.35E+09        | 1               |            | 120700         | -2062126        | 2303526        | 1               |
| M3.BC-M1.C2       | 4.69E+06        | -1.6E+09        | 1.56E+09        | 1               |            | 157000         | -2363510        | 2677510        | 1               |
| M3.BF-M1.C2       | 9.40E+06        | -1.3E+09        | 1.36E+09        | 1               |            | 629300         | -1553526        | 2812126        | 0.999963        |
| M3.C-M1.C2        | 3.47E+06        | -1.6E+09        | 1.56E+09        | 1               |            | 83520          | -2436990        | 2604030        | 1               |
| M3.E-M1.C2        | 2.90E+07        | -1.5E+09        | 1.58E+09        | 1               |            | 126000         | -2394510        | 2646510        | 1               |
| M3.O-M1.C2        | 2.69E+07        | -1.5E+09        | 1.58E+09        | 1               |            | 239800         | -2280710        | 2760310        | 1               |
| M4.BC-M1.C2       | -8.98E+05       | -1.6E+09        | 1.55E+09        | 1               |            | -124200        | -2644710        | 2396310        | 1               |
| M4.BF-M1.C2       | 1.02E+05        | -1.6E+09        | 1.56E+09        | 1               |            | 675800         | -1844710        | 3196310        | 0.999988        |
| M4.C-M1.C2        | -8.98E+05       | -1.6E+09        | 1.55E+09        | 1               |            | 715800         | -1804710        | 3236310        | 0.999971        |
| <b>M4.E-M1.C2</b> | <b>2.40E+09</b> | <b>8.43E+08</b> | <b>3.95E+09</b> | <b>3.14E-05</b> | <b>***</b> | 3175800        | 655290.1        | 5696310        | 0.002026        |
| <b>M4.O-M1.C2</b> | <b>3.00E+09</b> | <b>1.44E+09</b> | <b>4.55E+09</b> | <b>1E-07</b>    | <b>***</b> | <b>2075800</b> | <b>-444710</b>  | <b>4596310</b> | <b>0.25578</b>  |
| M5.BC-M1.C2       | -6.98E+05       | -1.6E+09        | 1.55E+09        | 1               |            | 1675800        | -844710         | 4196310        | 0.651995        |
| M5.BF-M1.C2       | -2.98E+05       | -1.6E+09        | 1.56E+09        | 1               |            | 2875800        | 355290.1        | 5396310        | 0.009675        |
| <b>M5.E-M1.C2</b> | <b>2.50E+09</b> | <b>9.43E+08</b> | <b>4.05E+09</b> | <b>1.13E-05</b> | <b>***</b> | <b>1975800</b> | <b>-544710</b>  | <b>4496310</b> | <b>0.340579</b> |
| <b>M5.O-M1.C2</b> | <b>6.50E+09</b> | <b>4.94E+09</b> | <b>8.05E+09</b> | <b>0</b>        |            | 6675800        | 4155290         | 9196310        | 0               |
| M1.C4-M1.C3       | 1.65E+05        | -1.6E+09        | 1.56E+09        | 1               |            | <b>1800</b>    | <b>-2518710</b> | <b>2522310</b> | <b>1</b>        |
| M2.AY-M1.C3       | 1.30E+07        | -1.5E+09        | 1.57E+09        | 1               |            | 822600         | -1697910        | 3343110        | 0.99976         |
| M2.BF-M1.C3       | 5.49E+06        | -1.6E+09        | 1.56E+09        | 1               |            | 402800         | -2117710        | 2923310        | 1               |
| M2.C-M1.C3        | 1.94E+06        | -1.3E+09        | 1.35E+09        | 1               |            | 93500          | -2089326        | 2276326        | 1               |

|                   |                 |                 |                 |                 |            |                |                 |                |                 |
|-------------------|-----------------|-----------------|-----------------|-----------------|------------|----------------|-----------------|----------------|-----------------|
| M3.BC-M1.C3       | 4.77E+06        | -1.6E+09        | 1.56E+09        | 1               |            | 129800         | -2390710        | 2650310        | 1               |
| M3.BF-M1.C3       | 9.48E+06        | -1.3E+09        | 1.36E+09        | 1               |            | 602100         | -1580726        | 2784926        | 0.999982        |
| M3.C-M1.C3        | 3.55E+06        | -1.6E+09        | 1.56E+09        | 1               |            | 56320          | -2464190        | 2576830        | 1               |
| M3.E-M1.C3        | 2.91E+07        | -1.5E+09        | 1.58E+09        | 1               |            | 98800          | -2421710        | 2619310        | 1               |
| M3.O-M1.C3        | 2.70E+07        | -1.5E+09        | 1.58E+09        | 1               |            | 212600         | -2307910        | 2733110        | 1               |
| M4.BC-M1.C3       | -8.16E+05       | -1.6E+09        | 1.55E+09        | 1               |            | -151400        | -2671910        | 2369110        | 1               |
| M4.BF-M1.C3       | 1.84E+05        | -1.6E+09        | 1.56E+09        | 1               |            | 648600         | -1871910        | 3169110        | 0.999994        |
| M4.C-M1.C3        | -8.16E+05       | -1.6E+09        | 1.55E+09        | 1               |            | 688600         | -1831910        | 3209110        | 0.999984        |
| <b>M4.E-M1.C3</b> | <b>2.40E+09</b> | <b>8.43E+08</b> | <b>3.95E+09</b> | <b>3.13E-05</b> | <b>***</b> | 3148600        | 628090.1        | 5669110        | 0.002348        |
| <b>M4.O-M1.C3</b> | <b>3.00E+09</b> | <b>1.44E+09</b> | <b>4.55E+09</b> | <b>1E-07</b>    | <b>***</b> | <b>2048600</b> | <b>-471910</b>  | <b>4569110</b> | <b>0.277399</b> |
| M5.BC-M1.C3       | -6.16E+05       | -1.6E+09        | 1.55E+09        | 1               |            | 1648600        | -871910         | 4169110        | 0.680415        |
| M5.BF-M1.C3       | -2.16E+05       | -1.6E+09        | 1.56E+09        | 1               |            | 2848600        | 328090.1        | 5369110        | 0.011067        |
| <b>M5.E-M1.C3</b> | <b>2.50E+09</b> | <b>9.43E+08</b> | <b>4.05E+09</b> | <b>1.13E-05</b> | <b>***</b> | 1948600        | -571910         | 4469110        | 0.366035        |
| <b>M5.O-M1.C3</b> | <b>6.50E+09</b> | <b>4.94E+09</b> | <b>8.05E+09</b> | <b>0</b>        |            | 6648600        | 4128090         | 9169110        | 0               |
| M2.AY-M1.C4       | 1.28E+07        | -1.5E+09        | 1.57E+09        | 1               |            | <b>820800</b>  | <b>-1699710</b> | <b>3341310</b> | <b>0.999767</b> |
| M2.BF-M1.C4       | 5.32E+06        | -1.6E+09        | 1.56E+09        | 1               |            | 401000         | -2119510        | 2921510        | 1               |
| M2.C-M1.C4        | 1.78E+06        | -1.3E+09        | 1.35E+09        | 1               |            | 91700          | -2091126        | 2274526        | 1               |
| M3.BC-M1.C4       | 4.61E+06        | -1.6E+09        | 1.56E+09        | 1               |            | 128000         | -2392510        | 2648510        | 1               |
| M3.BF-M1.C4       | 9.32E+06        | -1.3E+09        | 1.36E+09        | 1               |            | 600300         | -1582526        | 2783126        | 0.999983        |
| M3.C-M1.C4        | 3.38E+06        | -1.6E+09        | 1.56E+09        | 1               |            | 54520          | -2465990        | 2575030        | 1               |
| M3.E-M1.C4        | 2.89E+07        | -1.5E+09        | 1.58E+09        | 1               |            | 97000          | -2423510        | 2617510        | 1               |
| M3.O-M1.C4        | 2.68E+07        | -1.5E+09        | 1.58E+09        | 1               |            | 210800         | -2309710        | 2731310        | 1               |
| M4.BC-M1.C4       | -9.81E+05       | -1.6E+09        | 1.55E+09        | 1               |            | -153200        | -2673710        | 2367310        | 1               |
| M4.BF-M1.C4       | 1.90E+04        | -1.6E+09        | 1.56E+09        | 1               |            | 646800         | -1873710        | 3167310        | 0.999994        |
| M4.C-M1.C4        | -9.81E+05       | -1.6E+09        | 1.55E+09        | 1               |            | 686800         | -1833710        | 3207310        | 0.999985        |
| <b>M4.E-M1.C4</b> | <b>2.40E+09</b> | <b>8.43E+08</b> | <b>3.95E+09</b> | <b>3.14E-05</b> | <b>***</b> | 3146800        | 626290.1        | 5667310        | 0.00237         |
| <b>M4.O-M1.C4</b> | <b>3.00E+09</b> | <b>1.44E+09</b> | <b>4.55E+09</b> | <b>1E-07</b>    | <b>***</b> | <b>2046800</b> | <b>-473710</b>  | <b>4567310</b> | <b>0.278868</b> |
| M5.BC-M1.C4       | -7.81E+05       | -1.6E+09        | 1.55E+09        | 1               |            | 1646800        | -873710         | 4167310        | 0.682274        |
| M5.BF-M1.C4       | -3.81E+05       | -1.6E+09        | 1.56E+09        | 1               |            | 2846800        | 326290.1        | 5367310        | 0.011165        |

|                   |                 |                 |                 |                 |            |                |                 |                |          |
|-------------------|-----------------|-----------------|-----------------|-----------------|------------|----------------|-----------------|----------------|----------|
| <b>M5.E-M1.C4</b> | <b>2.50E+09</b> | <b>9.43E+08</b> | <b>4.05E+09</b> | <b>1.13E-05</b> | <b>***</b> | 1946800        | -573710         | 4467310        | 0.367752 |
| <b>M5.O-M1.C4</b> | <b>6.50E+09</b> | <b>4.94E+09</b> | <b>8.05E+09</b> | <b>0</b>        |            | 6646800        | 4126290         | 9167310        | 0        |
| M2.BF-M2.AY       | -7.52E+06       | -1.6E+09        | 1.55E+09        | 1               |            | <b>-419800</b> | <b>-2940310</b> | <b>2100710</b> | <b>1</b> |
| M2.C-M2.AY        | -1.11E+07       | -1.4E+09        | 1.34E+09        | 1               |            | -729100        | -2911926        | 1453726        | 0.999664 |
| M3.BC-M2.AY       | -8.23E+06       | -1.6E+09        | 1.55E+09        | 1               |            | -692800        | -3213310        | 1827710        | 0.999983 |
| M3.BF-M2.AY       | -3.52E+06       | -1.4E+09        | 1.34E+09        | 1               |            | -220500        | -2403326        | 1962326        | 1        |
| M3.C-M2.AY        | -9.46E+06       | -1.6E+09        | 1.55E+09        | 1               |            | -766280        | -3286790        | 1754230        | 0.999916 |
| M3.E-M2.AY        | 1.61E+07        | -1.5E+09        | 1.57E+09        | 1               |            | -723800        | -3244310        | 1796710        | 0.999965 |
| M3.O-M2.AY        | 1.40E+07        | -1.5E+09        | 1.57E+09        | 1               |            | -610000        | -3130510        | 1910510        | 0.999998 |
| M4.BC-M2.AY       | -1.38E+07       | -1.6E+09        | 1.54E+09        | 1               |            | -974000        | -3494510        | 1546510        | 0.997557 |
| M4.BF-M2.AY       | -1.28E+07       | -1.6E+09        | 1.54E+09        | 1               |            | -174000        | -2694510        | 2346510        | 1        |
| M4.C-M2.AY        | -1.38E+07       | -1.6E+09        | 1.54E+09        | 1               |            | -134000        | -2654510        | 2386510        | 1        |
| <b>M4.E-M2.AY</b> | <b>2.39E+09</b> | <b>8.3E+08</b>  | <b>3.94E+09</b> | <b>3.57E-05</b> | <b>***</b> | 2326000        | -194510         | 4846510        | 0.109095 |
| <b>M4.O-M2.AY</b> | <b>2.99E+09</b> | <b>1.43E+09</b> | <b>4.54E+09</b> | <b>1E-07</b>    | <b>***</b> | 1226000        | -1294510        | 3746510        | 0.966468 |
| M5.BC-M2.AY       | -1.36E+07       | -1.6E+09        | 1.54E+09        | 1               |            | 826000         | -1694510        | 3346510        | 0.999745 |
| M5.BF-M2.AY       | -1.32E+07       | -1.6E+09        | 1.54E+09        | 1               |            | 2026000        | -494510         | 4546510        | 0.296201 |
| <b>M5.E-M2.AY</b> | <b>2.49E+09</b> | <b>9.3E+08</b>  | <b>4.04E+09</b> | <b>1.29E-05</b> | <b>***</b> | 1126000        | -1394510        | 3646510        | 0.9862   |
| <b>M5.O-M2.AY</b> | <b>6.49E+09</b> | <b>4.93E+09</b> | <b>8.04E+09</b> | <b>0</b>        |            | 5826000        | 3305490         | 8346510        | 0        |
| M2.C-M2.BF        | -3.55E+06       | -1.4E+09        | 1.34E+09        | 1               |            | <b>-309300</b> | <b>-2492126</b> | <b>1873526</b> | <b>1</b> |
| M3.BC-M2.BF       | -7.18E+05       | -1.6E+09        | 1.55E+09        | 1               |            | -273000        | -2793510        | 2247510        | 1        |
| M3.BF-M2.BF       | 3.99E+06        | -1.3E+09        | 1.35E+09        | 1               |            | 199300         | -1983526        | 2382126        | 1        |
| M3.C-M2.BF        | -1.94E+06       | -1.6E+09        | 1.55E+09        | 1               |            | -346480        | -2866990        | 2174030        | 1        |
| M3.E-M2.BF        | 2.36E+07        | -1.5E+09        | 1.58E+09        | 1               |            | -304000        | -2824510        | 2216510        | 1        |
| M3.O-M2.BF        | 2.15E+07        | -1.5E+09        | 1.58E+09        | 1               |            | -190200        | -2710710        | 2330310        | 1        |
| M4.BC-M2.BF       | -6.30E+06       | -1.6E+09        | 1.55E+09        | 1               |            | -554200        | -3074710        | 1966310        | 1        |
| M4.BF-M2.BF       | -5.30E+06       | -1.6E+09        | 1.55E+09        | 1               |            | 245800         | -2274710        | 2766310        | 1        |
| M4.C-M2.BF        | -6.30E+06       | -1.6E+09        | 1.55E+09        | 1               |            | 285800         | -2234710        | 2806310        | 1        |
| <b>M4.E-M2.BF</b> | <b>2.39E+09</b> | <b>8.37E+08</b> | <b>3.95E+09</b> | <b>3.31E-05</b> | <b>***</b> | 2745800        | 225290.1        | 5266310        | 0.018169 |
| <b>M4.O-M2.BF</b> | <b>2.99E+09</b> | <b>1.44E+09</b> | <b>4.55E+09</b> | <b>1E-07</b>    | <b>***</b> | 1645800        | -874710         | 4166310        | 0.683305 |

|                   |                 |                 |                 |                 |            |                |                 |                |                 |
|-------------------|-----------------|-----------------|-----------------|-----------------|------------|----------------|-----------------|----------------|-----------------|
| M5.BC-M2.BF       | -6.10E+06       | -1.6E+09        | 1.55E+09        | 1               |            | 1245800        | -1274710        | 3766310        | 0.960816        |
| M5.BF-M2.BF       | -5.70E+06       | -1.6E+09        | 1.55E+09        | 1               |            | 2445800        | -74709.9        | 4966310        | 0.068222        |
| <b>M5.E-M2.BF</b> | <b>2.49E+09</b> | <b>9.37E+08</b> | <b>4.05E+09</b> | <b>1.19E-05</b> | <b>***</b> | 1545800        | -974710         | 4066310        | 0.780404        |
| <b>M5.O-M2.BF</b> | <b>6.49E+09</b> | <b>4.94E+09</b> | <b>8.05E+09</b> | <b>0</b>        |            | 6245800        | 3725290         | 8766310        | 0               |
| M3.BC-M2.C        | 2.83E+06        | -1.3E+09        | 1.35E+09        | 1               |            | <b>36300</b>   | <b>-2146526</b> | <b>2219126</b> | <b>1</b>        |
| M3.BF-M2.C        | 7.54E+06        | -1.1E+09        | 1.11E+09        | 1               |            | 508600         | -1273670        | 2290870        | 0.999969        |
| M3.C-M2.C         | 1.61E+06        | -1.3E+09        | 1.35E+09        | 1               |            | -37180         | -2220006        | 2145646        | 1               |
| M3.E-M2.C         | 2.71E+07        | -1.3E+09        | 1.37E+09        | 1               |            | 5300           | -2177526        | 2188126        | 1               |
| M3.O-M2.C         | 2.50E+07        | -1.3E+09        | 1.37E+09        | 1               |            | 119100         | -2063726        | 2301926        | 1               |
| M4.BC-M2.C        | -2.76E+06       | -1.3E+09        | 1.34E+09        | 1               |            | -244900        | -2427726        | 1937926        | 1               |
| M4.BF-M2.C        | -1.76E+06       | -1.3E+09        | 1.35E+09        | 1               |            | 555100         | -1627726        | 2737926        | 0.999995        |
| M4.C-M2.C         | -2.76E+06       | -1.3E+09        | 1.34E+09        | 1               |            | 595100         | -1587726        | 2777926        | 0.999985        |
| <b>M4.E-M2.C</b>  | <b>2.40E+09</b> | <b>1.05E+09</b> | <b>3.74E+09</b> | <b>7E-07</b>    | <b>***</b> | 3055100        | 872274.4        | 5237926        | 0.000275        |
| <b>M4.O-M2.C</b>  | <b>3.00E+09</b> | <b>1.65E+09</b> | <b>4.34E+09</b> | <b>0</b>        |            | <b>1955100</b> | <b>-227726</b>  | <b>4137926</b> | <b>0.140242</b> |
| M5.BC-M2.C        | -2.56E+06       | -1.3E+09        | 1.34E+09        | 1               |            | 1555100        | -627726         | 3737926        | 0.523015        |
| M5.BF-M2.C        | -2.16E+06       | -1.3E+09        | 1.35E+09        | 1               |            | 2755100        | 572274.4        | 4937926        | 0.001966        |
| <b>M5.E-M2.C</b>  | <b>2.50E+09</b> | <b>1.15E+09</b> | <b>3.84E+09</b> | <b>2E-07</b>    | <b>***</b> | <b>1855100</b> | <b>-327726</b>  | <b>4037926</b> | <b>0.207837</b> |
| <b>M5.O-M2.C</b>  | <b>6.50E+09</b> | <b>5.15E+09</b> | <b>7.84E+09</b> | <b>0</b>        |            | 6555100        | 4372274         | 8737926        | 0               |
| M3.BF-M3.BC       | 4.71E+06        | -1.3E+09        | 1.35E+09        | 1               |            | <b>472300</b>  | <b>-1710526</b> | <b>2655126</b> | <b>1</b>        |
| M3.C-M3.BC        | -1.22E+06       | -1.6E+09        | 1.55E+09        | 1               |            | -73480         | -2593990        | 2447030        | 1               |
| M3.E-M3.BC        | 2.43E+07        | -1.5E+09        | 1.58E+09        | 1               |            | -31000         | -2551510        | 2489510        | 1               |
| M3.O-M3.BC        | 2.22E+07        | -1.5E+09        | 1.58E+09        | 1               |            | 82800          | -2437710        | 2603310        | 1               |
| M4.BC-M3.BC       | -5.59E+06       | -1.6E+09        | 1.55E+09        | 1               |            | -281200        | -2801710        | 2239310        | 1               |
| M4.BF-M3.BC       | -4.59E+06       | -1.6E+09        | 1.55E+09        | 1               |            | 518800         | -2001710        | 3039310        | 1               |
| M4.C-M3.BC        | -5.59E+06       | -1.6E+09        | 1.55E+09        | 1               |            | 558800         | -1961710        | 3079310        | 1               |
| <b>M4.E-M3.BC</b> | <b>2.39E+09</b> | <b>8.38E+08</b> | <b>3.95E+09</b> | <b>3.29E-05</b> | <b>***</b> | 3018800        | 498290.1        | 5539310        | 0.004674        |
| <b>M4.O-M3.BC</b> | <b>2.99E+09</b> | <b>1.44E+09</b> | <b>4.55E+09</b> | <b>1E-07</b>    | <b>***</b> | <b>1918800</b> | <b>-601710</b>  | <b>4439310</b> | <b>0.394955</b> |
| M5.BC-M3.BC       | -5.39E+06       | -1.6E+09        | 1.55E+09        | 1               |            | 1518800        | -1001710        | 4039310        | 0.804045        |
| M5.BF-M3.BC       | -4.99E+06       | -1.6E+09        | 1.55E+09        | 1               |            | 2718800        | 198290.1        | 5239310        | 0.020627        |

|             |           |          |          |          |     |         |          |         |          |
|-------------|-----------|----------|----------|----------|-----|---------|----------|---------|----------|
| M5.E-M3.BC  | 2.49E+09  | 9.38E+08 | 4.05E+09 | 1.19E-05 | *** | 1818800 | -701710  | 4339310 | 0.498212 |
| M5.O-M3.BC  | 6.49E+09  | 4.94E+09 | 8.05E+09 | 0        |     | 6518800 | 3998290  | 9039310 | 0        |
| M3.C-M3.BF  | -5.93E+06 | -1.4E+09 | 1.34E+09 | 1        |     | -545780 | -2728606 | 1637046 | 0.999996 |
| M3.E-M3.BF  | 1.96E+07  | -1.3E+09 | 1.37E+09 | 1        |     | -503300 | -2686126 | 1679526 | 0.999999 |
| M3.O-M3.BF  | 1.75E+07  | -1.3E+09 | 1.36E+09 | 1        |     | -389500 | -2572326 | 1793326 | 1        |
| M4.BC-M3.BF | -1.03E+07 | -1.4E+09 | 1.34E+09 | 1        |     | -753500 | -2936326 | 1429326 | 0.999464 |
| M4.BF-M3.BF | -9.30E+06 | -1.4E+09 | 1.34E+09 | 1        |     | 46500   | -2136326 | 2229326 | 1        |
| M4.C-M3.BF  | -1.03E+07 | -1.4E+09 | 1.34E+09 | 1        |     | 86500   | -2096326 | 2269326 | 1        |
| M4.E-M3.BF  | 2.39E+09  | 1.04E+09 | 3.74E+09 | 7E-07    | *** | 2546500 | 363674.4 | 4729326 | 0.006993 |
| M4.O-M3.BF  | 2.99E+09  | 1.64E+09 | 4.34E+09 | 0        |     | 1446500 | -736326  | 3629326 | 0.657815 |
| M5.BC-M3.BF | -1.01E+07 | -1.4E+09 | 1.34E+09 | 1        |     | 1046500 | -1136326 | 3229326 | 0.97096  |
| M5.BF-M3.BF | -9.70E+06 | -1.4E+09 | 1.34E+09 | 1        |     | 2246500 | 63674.43 | 4429326 | 0.036365 |
| M5.E-M3.BF  | 2.49E+09  | 1.14E+09 | 3.84E+09 | 2E-07    | *** | 1346500 | -836326  | 3529326 | 0.772243 |
| M5.O-M3.BF  | 6.49E+09  | 5.14E+09 | 7.84E+09 | 0        |     | 6046500 | 3863674  | 8229326 | 0        |
| M3.E-M3.C   | 2.55E+07  | -1.5E+09 | 1.58E+09 | 1        |     | 42480   | -2478030 | 2562990 | 1        |
| M3.O-M3.C   | 2.34E+07  | -1.5E+09 | 1.58E+09 | 1        |     | 156280  | -2364230 | 2676790 | 1        |
| M4.BC-M3.C  | -4.37E+06 | -1.6E+09 | 1.55E+09 | 1        |     | -207720 | -2728230 | 2312790 | 1        |
| M4.BF-M3.C  | -3.37E+06 | -1.6E+09 | 1.55E+09 | 1        |     | 592280  | -1928230 | 3112790 | 0.999999 |
| M4.C-M3.C   | -4.37E+06 | -1.6E+09 | 1.55E+09 | 1        |     | 632280  | -1888230 | 3152790 | 0.999996 |
| M4.E-M3.C   | 2.39E+09  | 8.39E+08 | 3.95E+09 | 3.25E-05 | *** | 3092280 | 571770.1 | 5612790 | 0.003175 |
| M4.O-M3.C   | 2.99E+09  | 1.44E+09 | 4.55E+09 | 1E-07    | *** | 1992280 | -528230  | 4512790 | 0.325626 |
| M5.BC-M3.C  | -4.17E+06 | -1.6E+09 | 1.55E+09 | 1        |     | 1592280 | -928230  | 4112790 | 0.736931 |
| M5.BF-M3.C  | -3.77E+06 | -1.6E+09 | 1.55E+09 | 1        |     | 2792280 | 271770.1 | 5312790 | 0.014556 |
| M5.E-M3.C   | 2.49E+09  | 9.39E+08 | 4.05E+09 | 1.17E-05 | *** | 1892280 | -628230  | 4412790 | 0.421506 |
| M5.O-M3.C   | 6.49E+09  | 4.94E+09 | 8.05E+09 | 0        |     | 6592280 | 4071770  | 9112790 | 0        |
| M3.O-M3.E   | -2.12E+06 | -1.6E+09 | 1.55E+09 | 1        |     | 113800  | -2406710 | 2634310 | 1        |
| M4.BC-M3.E  | -2.99E+07 | -1.6E+09 | 1.53E+09 | 1        |     | -250200 | -2770710 | 2270310 | 1        |
| M4.BF-M3.E  | -2.89E+07 | -1.6E+09 | 1.53E+09 | 1        |     | 549800  | -1970710 | 3070310 | 1        |
| M4.C-M3.E   | -2.99E+07 | -1.6E+09 | 1.53E+09 | 1        |     | 589800  | -1930710 | 3110310 | 0.999999 |

|                   |                 |                 |                 |                 |            |                |                 |                |                 |
|-------------------|-----------------|-----------------|-----------------|-----------------|------------|----------------|-----------------|----------------|-----------------|
| <b>M4.E-M3.E</b>  | <b>2.37E+09</b> | <b>8.14E+08</b> | <b>3.92E+09</b> | <b>0.000042</b> | <b>***</b> | 3049800        | 529290.1        | 5570310        | 0.003974        |
| <b>M4.O-M3.E</b>  | <b>2.97E+09</b> | <b>1.41E+09</b> | <b>4.52E+09</b> | <b>1E-07</b>    | <b>***</b> | <b>1949800</b> | <b>-570710</b>  | <b>4470310</b> | <b>0.364892</b> |
| M5.BC-M3.E        | -2.97E+07       | -1.6E+09        | 1.53E+09        | 1               |            | 1549800        | -970710         | 4070310        | 0.776795        |
| M5.BF-M3.E        | -2.93E+07       | -1.6E+09        | 1.53E+09        | 1               |            | 2749800        | 229290.1        | 5270310        | 0.017829        |
| <b>M5.E-M3.E</b>  | <b>2.47E+09</b> | <b>9.14E+08</b> | <b>4.02E+09</b> | <b>1.52E-05</b> | <b>***</b> | 1849800        | -670710         | 4370310        | 0.46538         |
| <b>M5.O-M3.E</b>  | <b>6.47E+09</b> | <b>4.91E+09</b> | <b>8.02E+09</b> | <b>0</b>        |            | 6549800        | 4029290         | 9070310        | 0               |
| M4.BC-M3.O        | -2.78E+07       | -1.6E+09        | 1.53E+09        | 1               |            | <b>-364000</b> | <b>-2884510</b> | <b>2156510</b> | <b>1</b>        |
| M4.BF-M3.O        | -2.68E+07       | -1.6E+09        | 1.53E+09        | 1               |            | 436000         | -2084510        | 2956510        | 1               |
| M4.C-M3.O         | -2.78E+07       | -1.6E+09        | 1.53E+09        | 1               |            | 476000         | -2044510        | 2996510        | 1               |
| <b>M4.E-M3.O</b>  | <b>2.37E+09</b> | <b>8.16E+08</b> | <b>3.93E+09</b> | <b>4.11E-05</b> | <b>***</b> | 2936000        | 415490.1        | 5456510        | 0.007152        |
| <b>M4.O-M3.O</b>  | <b>2.97E+09</b> | <b>1.42E+09</b> | <b>4.53E+09</b> | <b>1E-07</b>    | <b>***</b> | <b>1836000</b> | <b>-684510</b>  | <b>4356510</b> | <b>0.479925</b> |
| M5.BC-M3.O        | -2.76E+07       | -1.6E+09        | 1.53E+09        | 1               |            | 1436000        | -1084510        | 3956510        | 0.867924        |
| M5.BF-M3.O        | -2.72E+07       | -1.6E+09        | 1.53E+09        | 1               |            | 2636000        | 115490.1        | 5156510        | 0.03016         |
| <b>M5.E-M3.O</b>  | <b>2.47E+09</b> | <b>9.16E+08</b> | <b>4.03E+09</b> | <b>1.49E-05</b> | <b>***</b> | 1736000        | -784510         | 4256510        | 0.58754         |
| <b>M5.O-M3.O</b>  | <b>6.47E+09</b> | <b>4.92E+09</b> | <b>8.03E+09</b> | <b>0</b>        |            | 6436000        | 3915490         | 8956510        | 0               |
| M4.BF-M4.BC       | 1.00E+06        | -1.6E+09        | 1.56E+09        | 1               |            | <b>800000</b>  | <b>-1720510</b> | <b>3320510</b> | <b>0.99984</b>  |
| M4.C-M4.BC        | -3.98E-05       | -1.6E+09        | 1.56E+09        | 1               |            | 840000         | -1680510        | 3360510        | 0.999675        |
| <b>M4.E-M4.BC</b> | <b>2.40E+09</b> | <b>8.44E+08</b> | <b>3.95E+09</b> | <b>3.11E-05</b> | <b>***</b> | 3300000        | 779490.1        | 5820510        | 0.00102         |
| <b>M4.O-M4.BC</b> | <b>3.00E+09</b> | <b>1.44E+09</b> | <b>4.55E+09</b> | <b>1E-07</b>    | <b>***</b> | <b>2200000</b> | <b>-320510</b>  | <b>4720510</b> | <b>0.17146</b>  |
| M5.BC-M4.BC       | 2.00E+05        | -1.6E+09        | 1.56E+09        | 1               |            | 1800000        | -720510         | 4320510        | 0.51836         |
| M5.BF-M4.BC       | 6.00E+05        | -1.6E+09        | 1.56E+09        | 1               |            | 3000000        | 479490.1        | 5520510        | 0.005153        |
| <b>M5.E-M4.BC</b> | <b>2.50E+09</b> | <b>9.44E+08</b> | <b>4.05E+09</b> | <b>1.12E-05</b> | <b>***</b> | <b>2100000</b> | <b>-420510</b>  | <b>4620510</b> | <b>0.237493</b> |
| <b>M5.O-M4.BC</b> | <b>6.50E+09</b> | <b>4.94E+09</b> | <b>8.05E+09</b> | <b>0</b>        |            | 6800000        | 4279490         | 9320510        | 0               |
| M4.C-M4.BF        | -1.00E+06       | -1.6E+09        | 1.55E+09        | 1               |            | <b>40000</b>   | <b>-2480510</b> | <b>2560510</b> | <b>1</b>        |
| <b>M4.E-M4.BF</b> | <b>2.40E+09</b> | <b>8.43E+08</b> | <b>3.95E+09</b> | <b>3.14E-05</b> | <b>***</b> | 2500000        | -20509.9        | 5020510        | 0.054524        |
| <b>M4.O-M4.BF</b> | <b>3.00E+09</b> | <b>1.44E+09</b> | <b>4.55E+09</b> | <b>1E-07</b>    | <b>***</b> | 1400000        | -1120510        | 3920510        | 0.891289        |
| M5.BC-M4.BF       | -8.00E+05       | -1.6E+09        | 1.55E+09        | 1               |            | 1000000        | -1520510        | 3520510        | 0.99659         |
| M5.BF-M4.BF       | -4.00E+05       | -1.6E+09        | 1.56E+09        | 1               |            | 2200000        | -320510         | 4720510        | 0.17146         |
| <b>M5.E-M4.BF</b> | <b>2.50E+09</b> | <b>9.43E+08</b> | <b>4.05E+09</b> | <b>1.13E-05</b> | <b>***</b> | 1300000        | -1220510        | 3820510        | 0.941781        |

|             |           |          |          |          |     |          |          |         |          |
|-------------|-----------|----------|----------|----------|-----|----------|----------|---------|----------|
| M5.O-M4.BF  | 6.50E+09  | 4.94E+09 | 8.05E+09 | 0        |     | 6000000  | 3479490  | 8520510 | 0        |
| M4.E-M4.C   | 2.40E+09  | 8.44E+08 | 3.95E+09 | 3.11E-05 | *** | 2460000  | -60509.9 | 4980510 | 0.064376 |
| M4.O-M4.C   | 3.00E+09  | 1.44E+09 | 4.55E+09 | 1E-07    | *** | 1360000  | -1160510 | 3880510 | 0.914001 |
| M5.BC-M4.C  | 2.00E+05  | -1.6E+09 | 1.56E+09 | 1        |     | 960000   | -1560510 | 3480510 | 0.997973 |
| M5.BF-M4.C  | 6.00E+05  | -1.6E+09 | 1.56E+09 | 1        |     | 2160000  | -360510  | 4680510 | 0.196039 |
| M5.E-M4.C   | 2.50E+09  | 9.44E+08 | 4.05E+09 | 1.12E-05 | *** | 1260000  | -1260510 | 3780510 | 0.956348 |
| M5.O-M4.C   | 6.50E+09  | 4.94E+09 | 8.05E+09 | 0        | *** | 5960000  | 3439490  | 8480510 | 0        |
| M4.O-M4.E   | 6.00E+08  | -9.6E+08 | 2.16E+09 | 0.997615 |     | -1100000 | -3620510 | 1420510 | 0.98937  |
| M5.BC-M4.E  | -2.40E+09 | -4E+09   | -8.4E+08 | 3.11E-05 | *** | -1500000 | -4020510 | 1020510 | 0.819731 |
| M5.BF-M4.E  | -2.40E+09 | -4E+09   | -8.4E+08 | 3.13E-05 | *** | -300000  | -2820510 | 2220510 | 1        |
| M5.E-M4.E   | 1.00E+08  | -1.5E+09 | 1.66E+09 | 1        |     | -1200000 | -3720510 | 1320510 | 0.972933 |
| M5.O-M4.E   | 4.10E+09  | 2.54E+09 | 5.66E+09 | 0        |     | 3500000  | 979490.1 | 6020510 | 0.000324 |
| M5.BC-M4.O  | -3.00E+09 | -4.6E+09 | -1.4E+09 | 1E-07    | *** | -400000  | -2920510 | 2120510 | 1        |
| M5.BF-M4.O  | -3.00E+09 | -4.6E+09 | -1.4E+09 | 1E-07    | *** | 800000   | -1720510 | 3320510 | 0.99984  |
| M5.E-M4.O   | -5.00E+08 | -2.1E+09 | 1.06E+09 | 0.999808 |     | -100000  | -2620510 | 2420510 | 1        |
| M5.O-M4.O   | 3.50E+09  | 1.94E+09 | 5.06E+09 | 0        | *** | 4600000  | 2079490  | 7120510 | 3E-07    |
| M5.BF-M5.BC | 4.00E+05  | -1.6E+09 | 1.56E+09 | 1        |     | 1200000  | -1320510 | 3720510 | 0.972933 |
| M5.E-M5.BC  | 2.50E+09  | 9.43E+08 | 4.05E+09 | 1.12E-05 | *** | 300000   | -2220510 | 2820510 | 1        |
| M5.O-M5.BC  | 6.50E+09  | 4.94E+09 | 8.05E+09 | 0        |     | 5000000  | 2479490  | 7520510 | 0        |
| M5.E-M5.BF  | 2.50E+09  | 9.43E+08 | 4.05E+09 | 1.13E-05 | *** | -900000  | -3420510 | 1620510 | 0.999143 |
| M5.O-M5.BF  | 6.50E+09  | 4.94E+09 | 8.05E+09 | 0        |     | 3800000  | 1279490  | 6320510 | 5.34E-05 |
| M5.O-M5.E   | 4.00E+09  | 2.44E+09 | 5.56E+09 | 0        |     | 4700000  | 2179490  | 7220510 | 2E-07    |
