# Supplementary material
Source: MDPI journal article supplement (https://www.mdpi.com/2571-8789/8/1/9)
Supplement: s1 [file s1]

Fig. S1. Rarefaction curves for alpha-diversity analysis. M1-M5 – soil sampling sites. C — initial parent material, — not altered by pedogenesis, Oi- initial litter, not altered by organic matter transformation process, Oe- litters, slightly transformed by enzymatic processes, AY- humus accumulative superficial soil horizon, BF- illuvial iron-oxide horizon, (e)— entic podzol horizon, BHF — illuvial iron-oxide-humic complexes horizon.

Fig. S2. Box-plots for the agrochemical measurements. M1-M5 – soil sampling sites. C — initial parent material, — not altered by pedogenesis, Oi- initial litter, not altered by organic matter transformation process, Oe- litters, slightly transformed by enzymatic processes, AY- humus accumulative superficial soil horizon, BF- illuvial iron-oxide horizon, (e)— entic podzol horizon, BHF — illuvial iron-oxide-humic complexes horizon.

Fig. S3. Box-plots for the alpha-diversity measurements. M1-M5 – soil sampling sites. C — initial parent material, — not altered by pedogenesis, Oi- initial litter, not altered by organic matter transformation process, Oe- litters, slightly transformed by enzymatic processes, AY- humus accumulative superficial soil horizon, BF- illuvial iron-oxide horizon, (e)— entic podzol horizon, BHF — illuvial iron-oxide-humic complexes horizon.
