# Supplementary material
Source: MDPI journal article supplement (https://www.mdpi.com/2571-8789/8/1/9)
Supplement: s1 [file s1]

Archive with 8 entries (8 files):
- FigS_captions.pdf
- FigureS1.jpg
- Fig_S2.pdf
- Fig_S3.pdf
- Table S1.pdf
- Table S2.pdf
- Table S3.xlsx
- TableS1-3_captions.pdf
