# Supplementary material
Source: MDPI journal article supplement (https://www.mdpi.com/2571-8789/8/1/9)
Supplement: s1 [file s1 › Table S1.pdf]

**Table S1.** Summary of ANOVA results of the abundance of bacteria and archaea estimated by quantitative PCR. Significant codes are: 0, '\*\*\*' for 0.001, '\*\*' for 0.01, '\*' for 0.05, '.' for 0.1, '' for 1.

|           |  | BACTERIA |          |          |         |                     |
|-----------|--|----------|----------|----------|---------|---------------------|
|           |  | Df       | Sum_Sq   | Mean_Sq  | F_value | Pr(>F) significance |
| Sample    |  | 20       | 2.70E+20 | 1.35E+19 | 30.17   | <2e-16 ***          |
| Residuals |  | 94       | 4.21E+19 | 4.48E+17 |         |                     |
|           |  | ARCHAEA  |          |          |         |                     |
| Sample    |  | 20       | 2.67E+14 | 1.34E+13 | 11.35   | <2e-16 ***          |
| Residuals |  | 94       | 1.11E+14 | 1.18E+12 |         |                     |

Signif.codes:

0 '\*\*\*' 0.001 '\*\*' 0.01 '\*' 0.05 '.' 0.1 '' 1
