# Supplementary material
Source: MDPI journal article supplement (https://www.mdpi.com/2571-8789/8/1/9)
Supplement: s1 [file s1 › Table S3.xlsx]

## Sheet: col.result (4)
		Phylum	Class	Order	Family	Genus	Species	name
AJ627422.38670.40139	V1	Thaumarchaeota	Nitrososphaeria	Nitrososphaerales	Nitrososphaeraceae	NA	NA	AJ627422.38670.40139
FJ439860.1.1500	V2	Proteobacteria	Alphaproteobacteria	Rhizobiales	Xanthobacteraceae	Bradyrhizobium	NA	FJ439860.1.1500
HE604017.1.1544	V3	Proteobacteria	Gammaproteobacteria	WD260	NA	NA	NA	HE604017.1.1544
Z95722.1.1551	V4	Acidobacteria	Blastocatellia (Subgroup 4)	Pyrinomonadales	Pyrinomonadaceae	RB41	NA	Z95722.1.1551
ABRA01002618.192.1704	V5	Proteobacteria	Alphaproteobacteria	Rhizobiales	Rhizobiaceae	Allorhizobium-Neorhizobium-Pararhizobium-Rhizobium	Rhizobium etli 8C-3	ABRA01002618.192.1704
KR088549.1.1526	V6	Actinobacteria	Actinobacteria	Micrococcales	Micrococcaceae	Arthrobacter	Arthrobacter sp, F7	KR088549.1.1526
EU881172.1.1524	V7	Acidobacteria	Blastocatellia (Subgroup 4)	Pyrinomonadales	Pyrinomonadaceae	RB41	NA	EU881172.1.1524
KC683186.1.1532	V8	Proteobacteria	Gammaproteobacteria	Betaproteobacteriales	Burkholderiaceae	Comamonas	NA	KC683186.1.1532
JQ978570.1.1500	V9	Gemmatimonadetes	Gemmatimonadetes	Gemmatimonadales	Gemmatimonadaceae	uncultured	NA	JQ978570.1.1500
LQOW01000023.119.1666	V10	Actinobacteria	Actinobacteria	Corynebacteriales	Mycobacteriaceae	Mycobacterium	Mycobacterium fragae	LQOW01000023.119.1666
HQ598789.1.1472	V11	Acidobacteria	Acidobacteriia	Acidobacteriales	NA	NA	NA	HQ598789.1.1472
JN868932.1.1483	V12	Proteobacteria	Alphaproteobacteria	Rhizobiales	Xanthobacteraceae	NA	NA	JN868932.1.1483
HQ674955.1.1489	V13	Acidobacteria	Acidobacteriia	Subgroup 2	NA	NA	NA	HQ674955.1.1489
AB821056.1.1459	V14	Proteobacteria	Alphaproteobacteria	Rhizobiales	Xanthobacteraceae	NA	NA	AB821056.1.1459
GEUY01000836.1.1611	V15	Proteobacteria	Gammaproteobacteria	Betaproteobacteriales	Burkholderiaceae	Ideonella	Cenchrus americanus	GEUY01000836.1.1611
CP012201.3677670.3679209	V16	Proteobacteria	Gammaproteobacteria	Betaproteobacteriales	Burkholderiaceae	Massilia	Massilia sp, NR 4-1	CP012201.3677670.3679209
KJ161326.1.1708	V17	Proteobacteria	Gammaproteobacteria	Pseudomonadales	Pseudomonadaceae	Pseudomonas	Pseudomonas putida	KJ161326.1.1708
CZKG01000048.33782.35294	V18	Actinobacteria	Thermoleophilia	Solirubrobacterales	Solirubrobacteraceae	NA	NA	CZKG01000048.33782.35294
DQ395983.1.1546	V19	Verrucomicrobia	Verrucomicrobiae	Chthoniobacterales	Chthoniobacteraceae	Candidatus Udaeobacter	NA	DQ395983.1.1546
AY963417.1.1453	V20	Acidobacteria	Acidobacteriia	Subgroup 2	NA	NA	NA	AY963417.1.1453
FPLS01061153.31.1531	V21	Bacteroidetes	Bacteroidia	Chitinophagales	Chitinophagaceae	NA	NA	FPLS01061153.31.1531
HQ119055.1.1525	V22	Acidobacteria	Subgroup 6	NA	NA	NA	NA	HQ119055.1.1525
EU861906.1.1464	V23	Chloroflexi	TK10	NA	NA	NA	NA	EU861906.1.1464
FJ479576.1.1527	V24	Acidobacteria	Blastocatellia (Subgroup 4)	Pyrinomonadales	Pyrinomonadaceae	RB41	NA	FJ479576.1.1527
AY138999.1.1524	V25	Proteobacteria	Gammaproteobacteria	Betaproteobacteriales	Burkholderiaceae	Variovorax	NA	AY138999.1.1524
EU335307.1.1499	V26	Acidobacteria	Acidobacteriia	Subgroup 2		NA	NA	EU335307.1.1499
JF429096.1.1517	V27	Proteobacteria	Gammaproteobacteria	Betaproteobacteriales	Nitrosomonadaceae	MND1	NA	JF429096.1.1517
CRKN01000054.4139.5702	V28	Firmicutes	Bacilli	Lactobacillales	Streptococcaceae	Streptococcus	Streptococcus sp.	CRKN01000054.4139.5702
CP009247.1399865.1401405	V29	Actinobacteria	Actinobacteria	Corynebacteriales	Corynebacteriaceae	Corynebacterium	Corynebacterium sp.	CP009247.1399865.1401405
FJ584392.1.976	V30	Thaumarchaeota	NA	NA	NA	NA	NA	FJ584392.1.976
DQ823224.1.1465	V31	Proteobacteria	Alphaproteobacteria	Rhizobiales	Beijerinckiaceae	NA	NA	DQ823224.1.1465
Z95710.1.1542	V32	Acidobacteria	Subgroup 6	NA	NA	NA	NA	Z95710.1.1542
BBHE01000968.162.1691	V33	Actinobacteria	Actinobacteria	Corynebacteriales	Mycobacteriaceae	Mycobacterium	Mycobacterium sp.	BBHE01000968.162.1691
JX545207.1.1517	V34	Actinobacteria	Actinobacteria	Micrococcales	Microbacteriaceae	Subtercola	Subtercola sp, N1-13	JX545207.1.1517
KX753099.1.1468	V35	Chloroflexi	AD3	NA	NA	NA	NA	KX753099.1.1468
KC195883.1.1542	V36	Proteobacteria	Gammaproteobacteria	Betaproteobacteriales	Burkholderiaceae	Burkholderia-Caballeronia-Paraburkholderia	Burkholderia multivorans	KC195883.1.1542
FPLS01053203.12.1549	V37	Proteobacteria	Deltaproteobacteria	Myxococcales	NA	NA	NA	FPLS01053203.12.1549
FPLS01007586.11.1491	V38	Chloroflexi	KD4-96	NA	NA	NA	NA	FPLS01007586.11.1491
KF712877.1.1498	V39	Actinobacteria	Thermoleophilia	Gaiellales	NA	NA	NA	KF712877.1.1498
JF267691.1.1491	V40	Proteobacteria	Gammaproteobacteria	Betaproteobacteriales	Nitrosomonadaceae	Ellin6067	NA	JF267691.1.1491
KF840371.1.1484	V41	Acidobacteria	Blastocatellia (Subgroup 4)	Blastocatellales	Blastocatellaceae	Stenotrophobacter	Stenotrophobacter terrae	KF840371.1.1484
FPLL01000761.10.1526	V42	Proteobacteria	Gammaproteobacteria	Betaproteobacteriales	Burkholderiaceae	Variovorax	NA	FPLL01000761.10.1526
FPLS01021885.16.1486	V43	Proteobacteria	Alphaproteobacteria	Rhizobiales	Xanthobacteraceae	NA	NA	FPLS01021885.16.1486
KM200557.1.1526	V44	Proteobacteria	Deltaproteobacteria	RCP2-54	NA	NA	NA	KM200557.1.1526
KJ192140.1.1528	V45	Verrucomicrobia	Verrucomicrobiae	Chthoniobacterales	Chthoniobacteraceae	Candidatus Udaeobacter	NA	KJ192140.1.1528
FJ872373.13200.14750	V46	Verrucomicrobia	Verrucomicrobiae	Chthoniobacterales	Chthoniobacteraceae	Chthoniobacter	NA	FJ872373.13200.14750
FPLS01016585.16.1534	V47	Proteobacteria	Gammaproteobacteria	Betaproteobacteriales	Nitrosomonadaceae	IS-44	NA	FPLS01016585.16.1534
NA - non-attributed sequence
