# Supplementary material
Source: MDPI journal article supplement (https://www.mdpi.com/2571-8789/8/1/9)

**Chao1**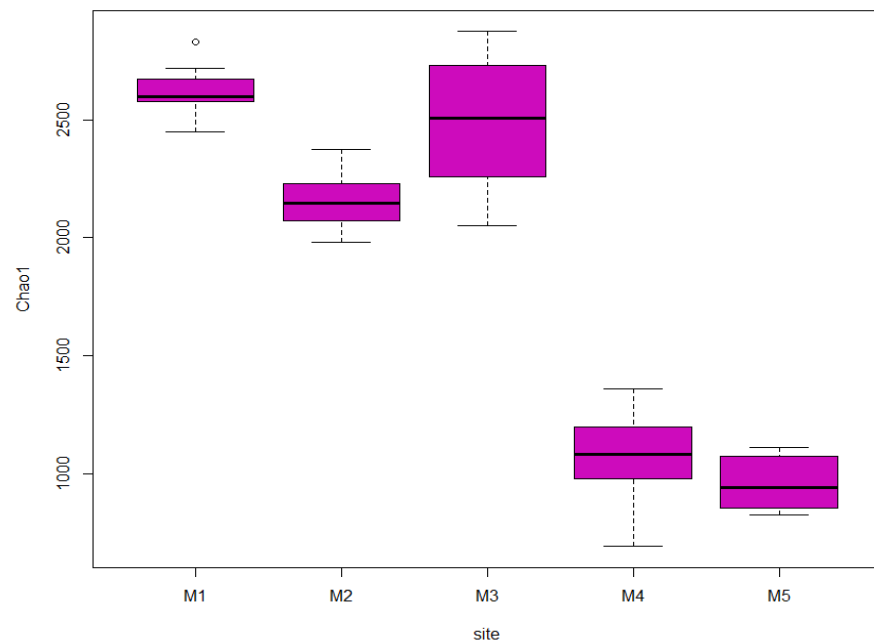**Good's\_coverage**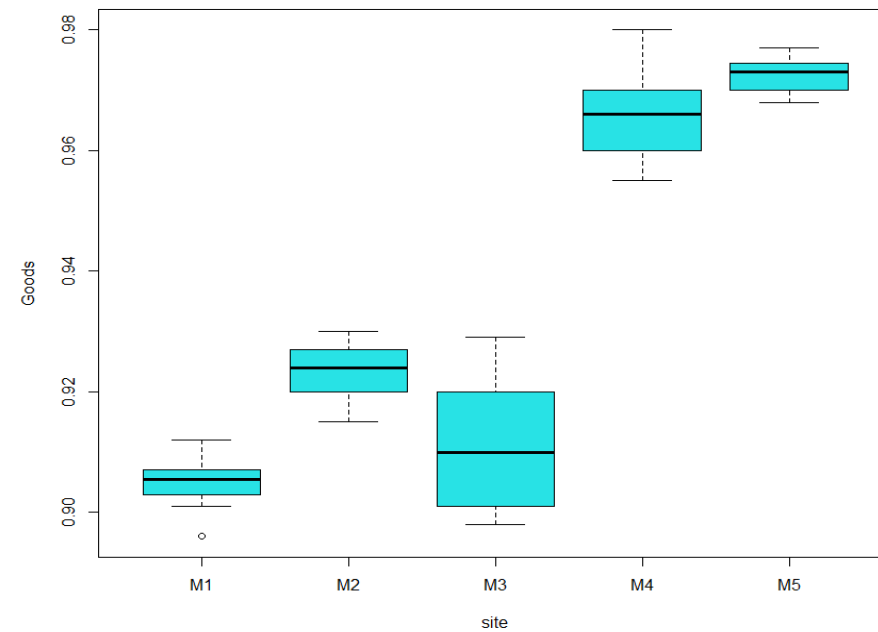**Obs\_ASVs**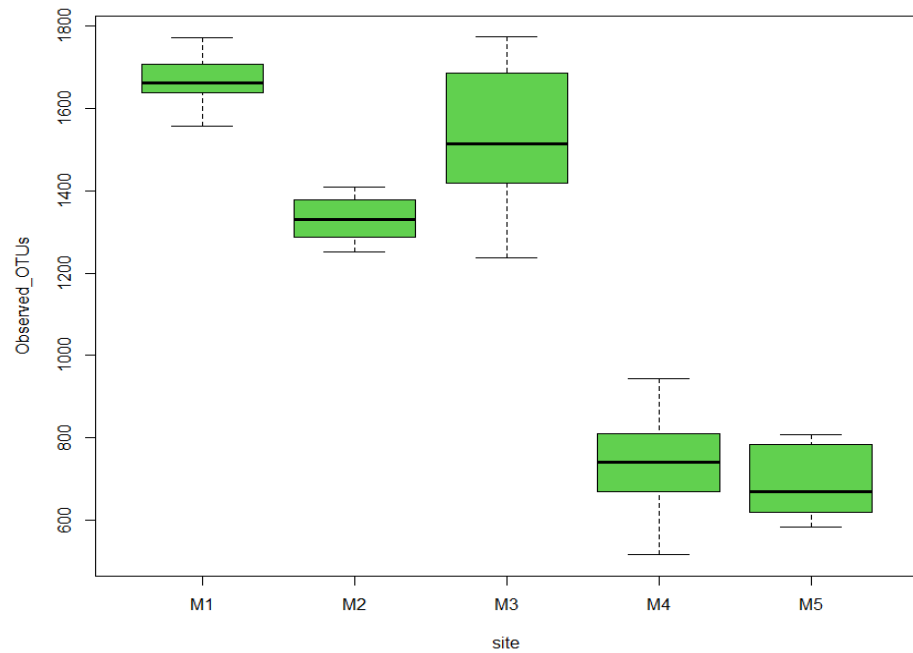**Shannon**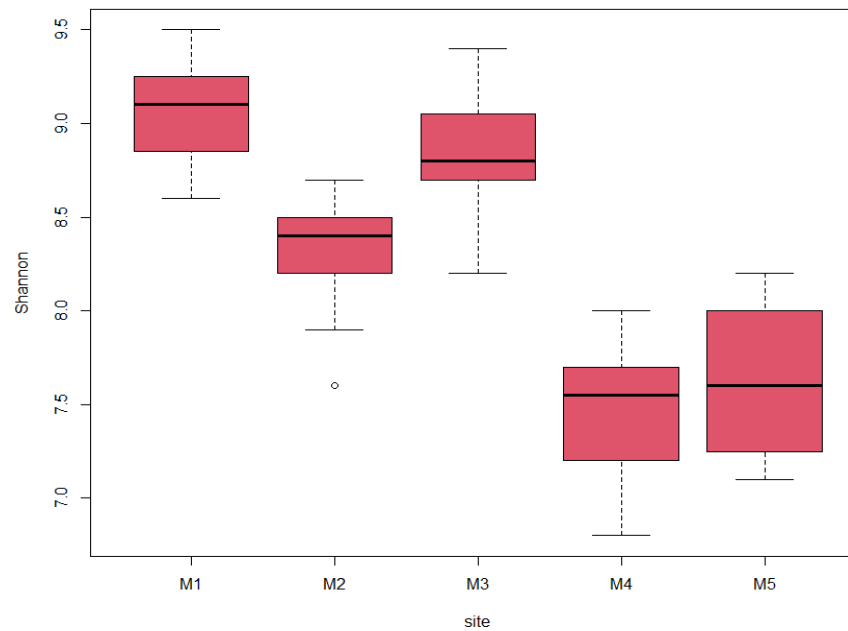**Faith\_PD**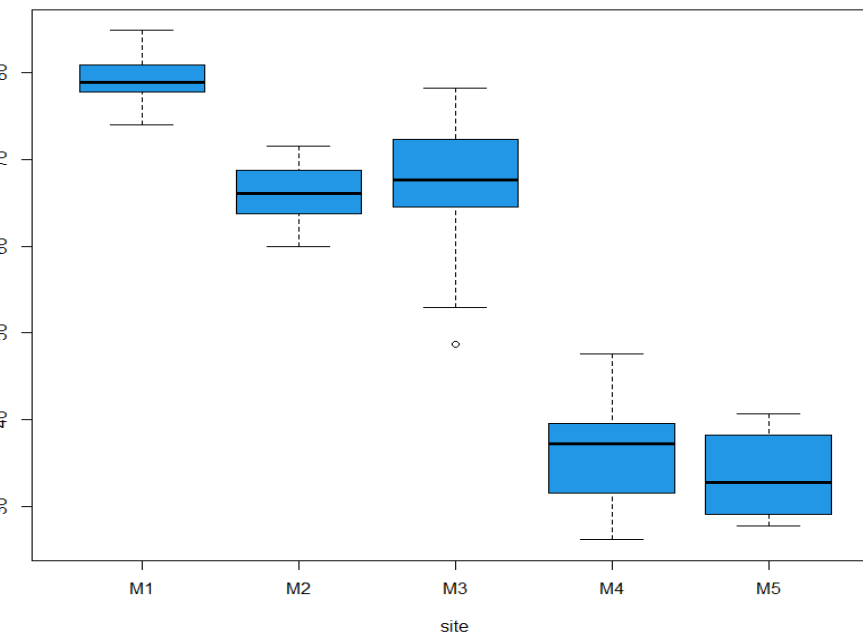

Supplement: s1 [file s1]

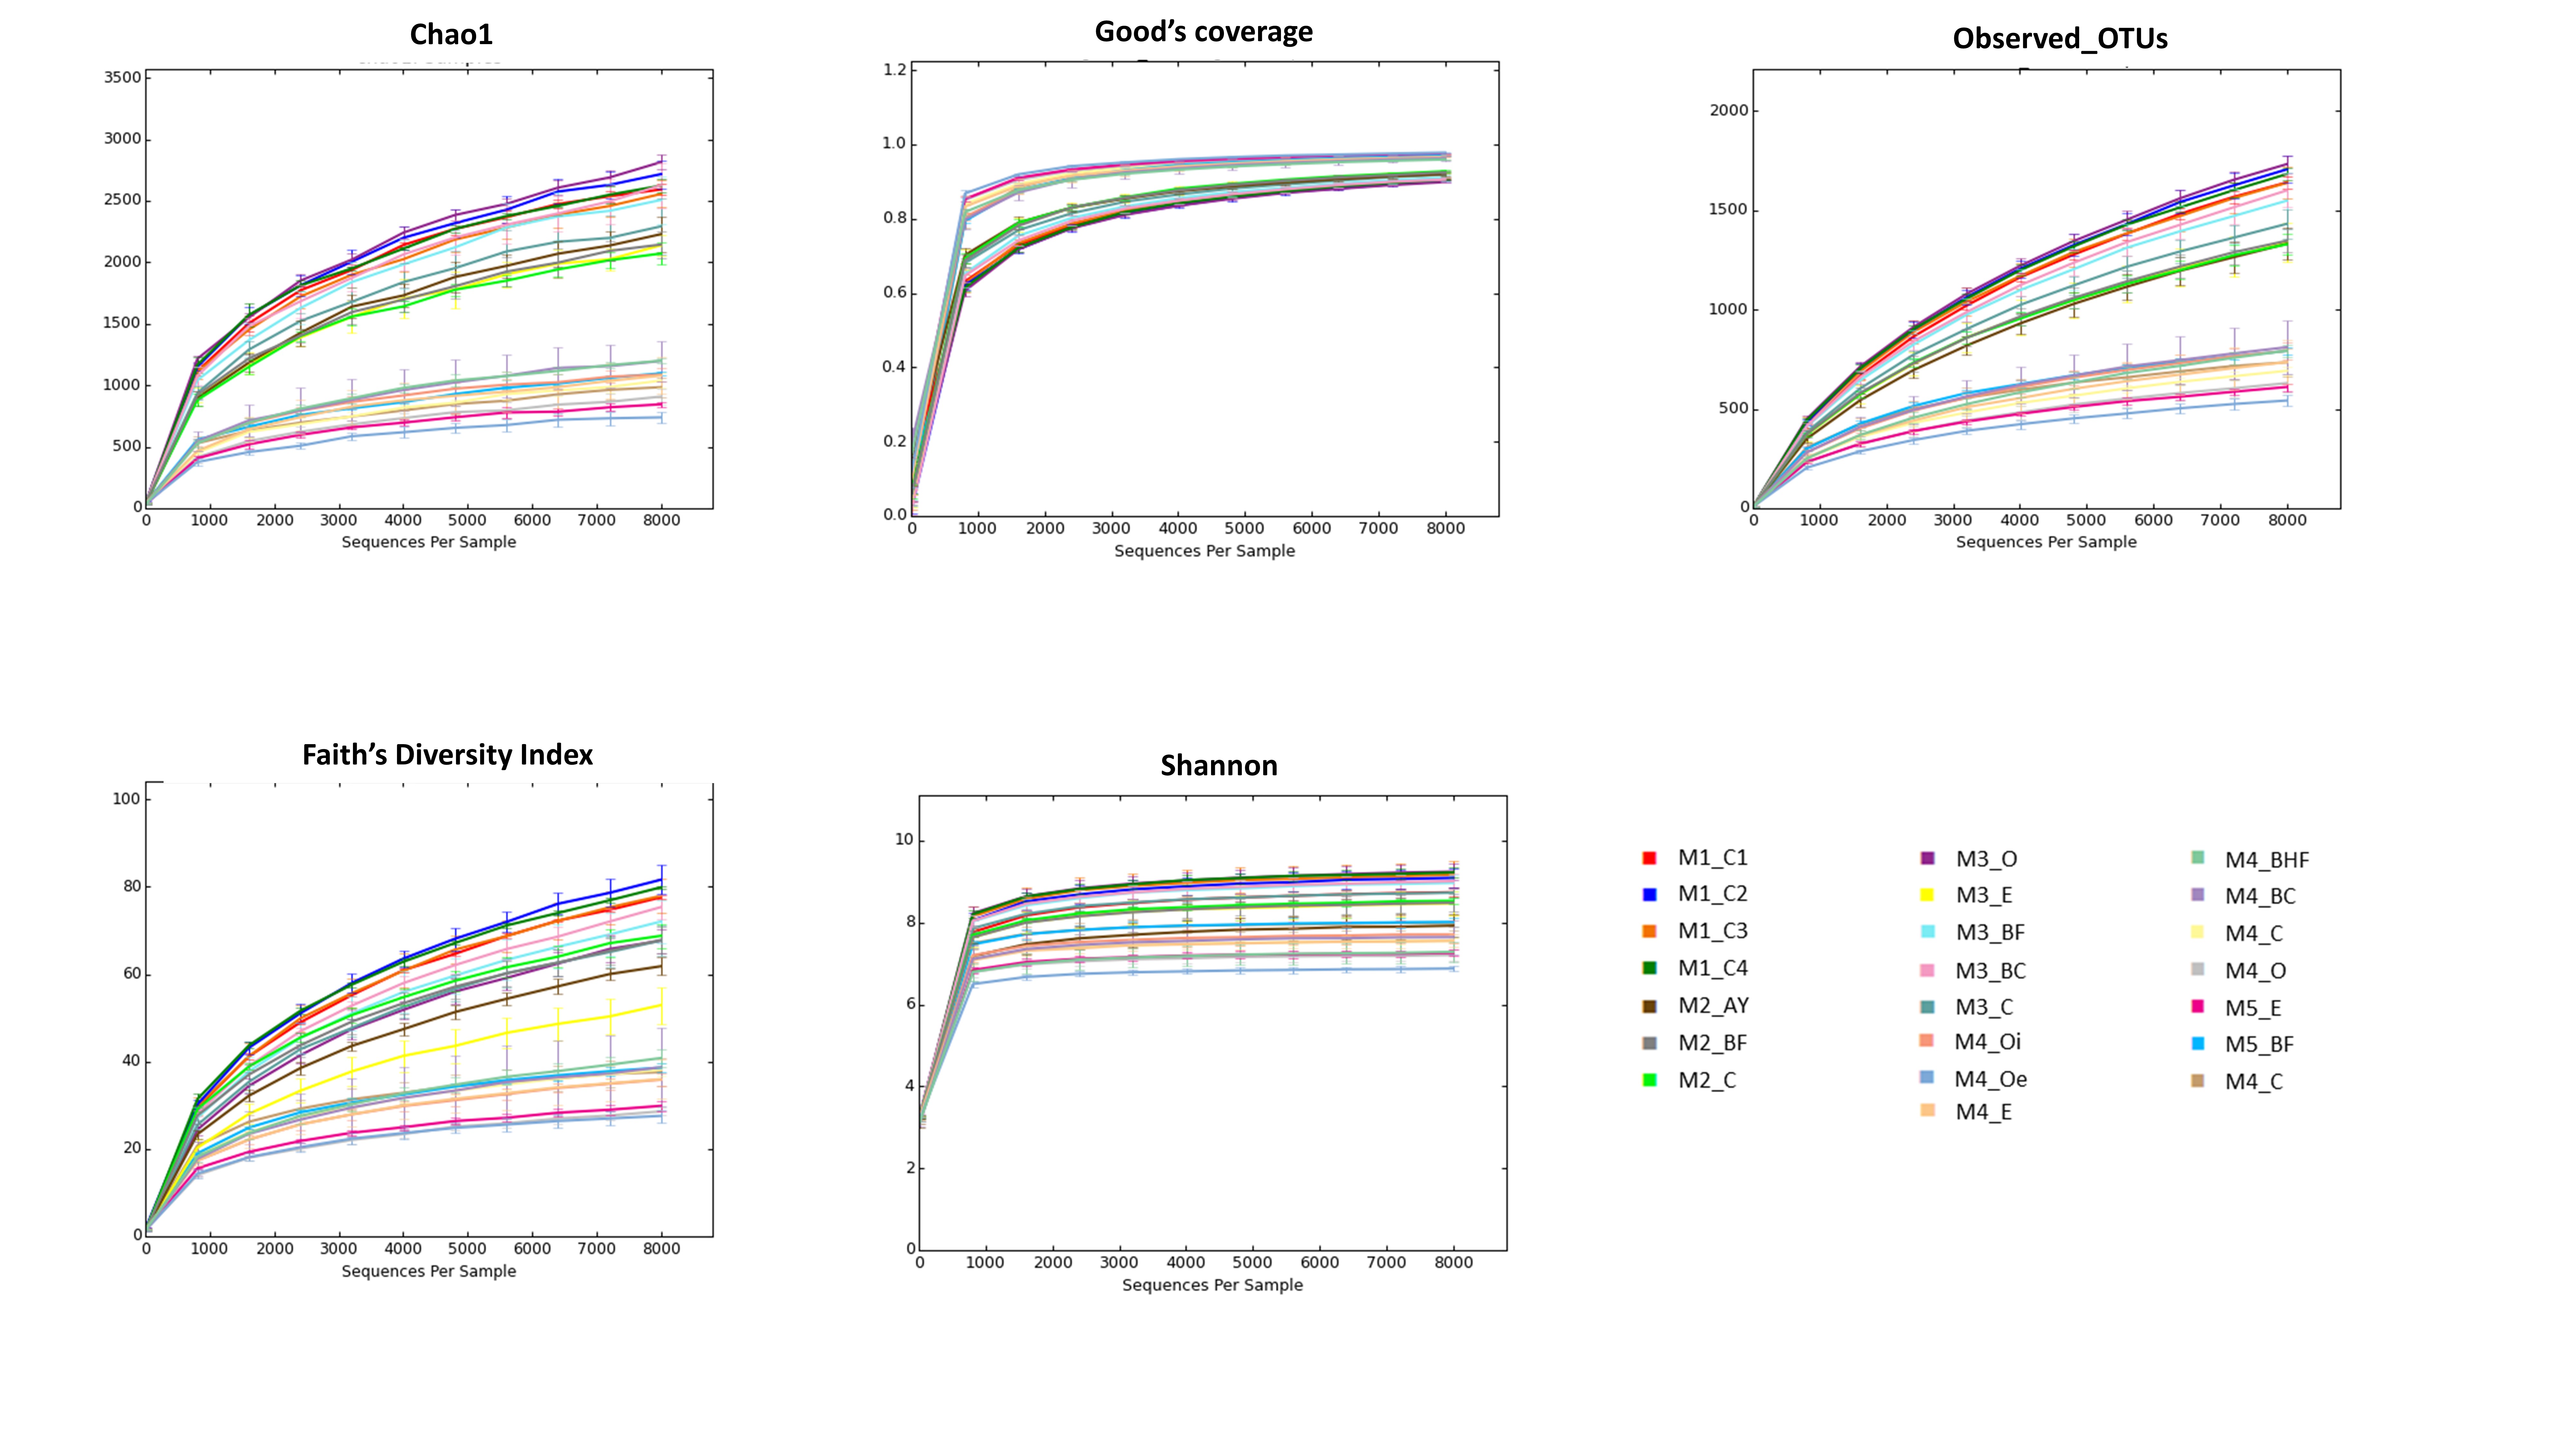

Supplement: s1 [file s1 › FigureS1.jpg]

**A**

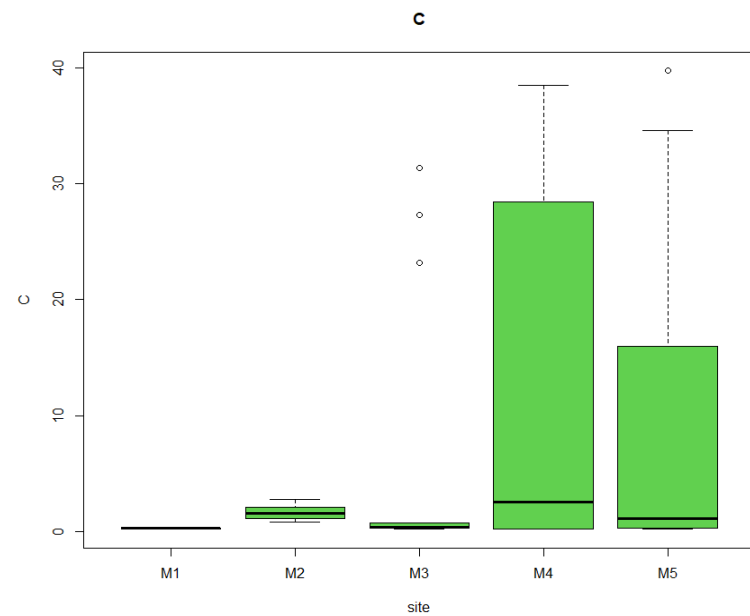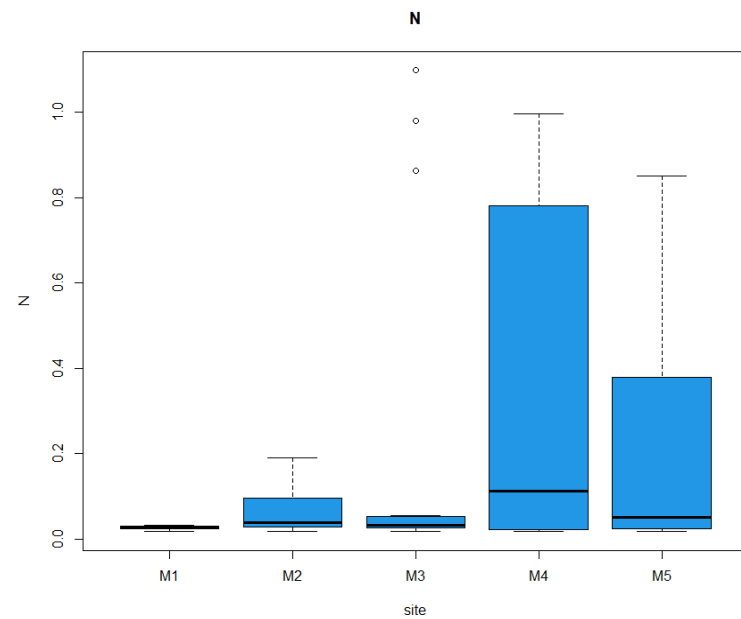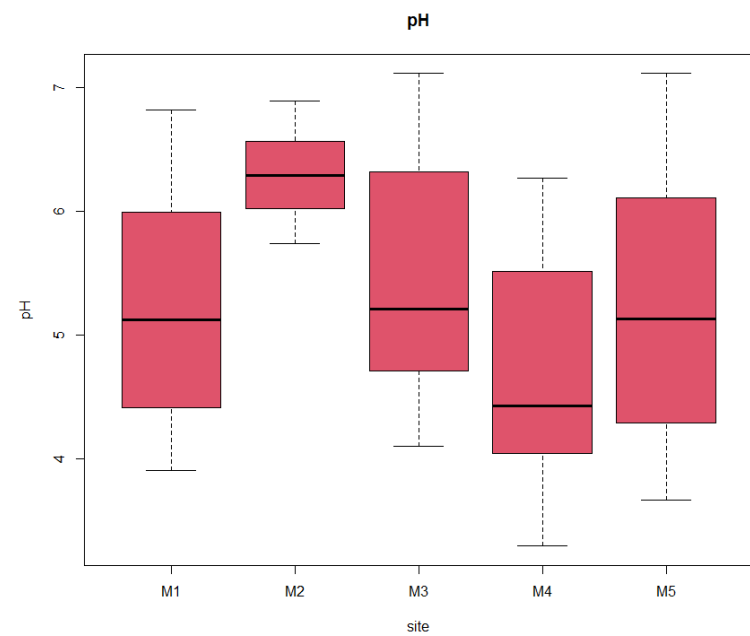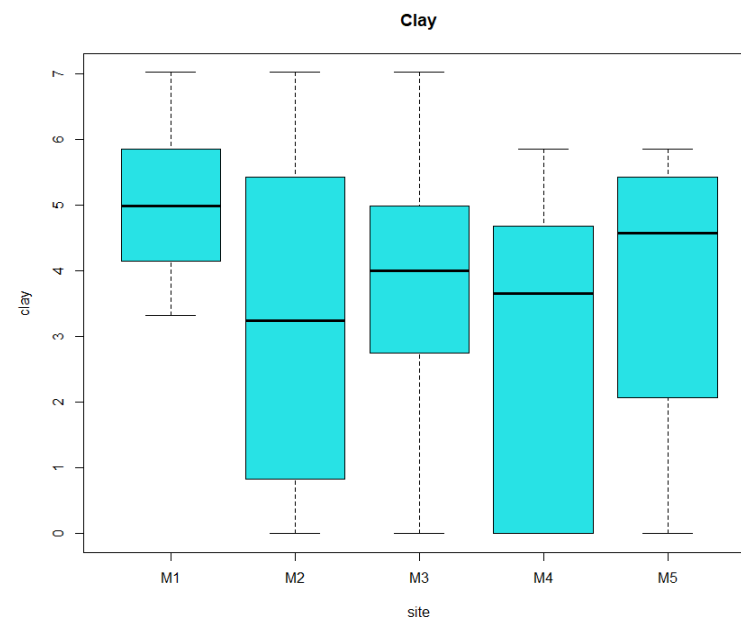

**B**

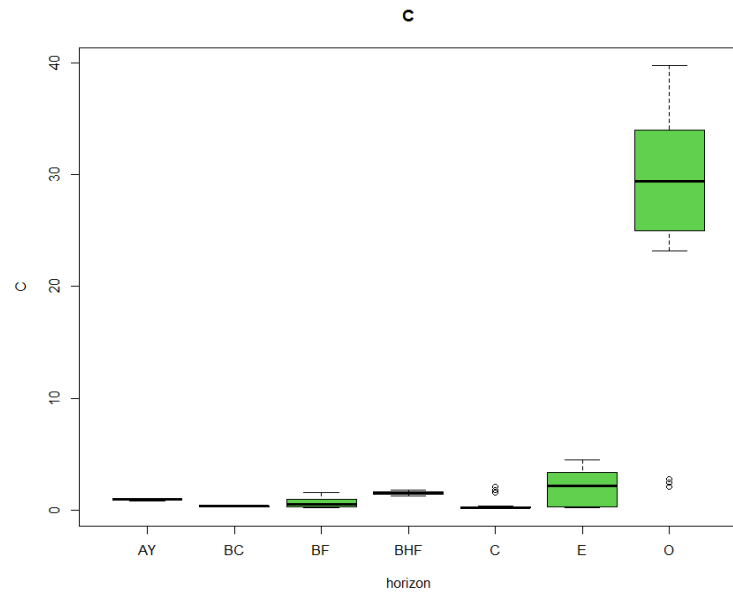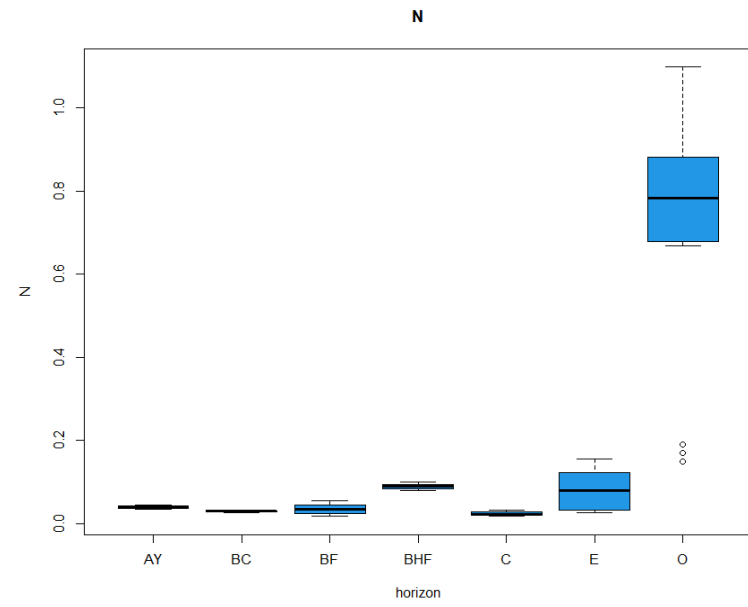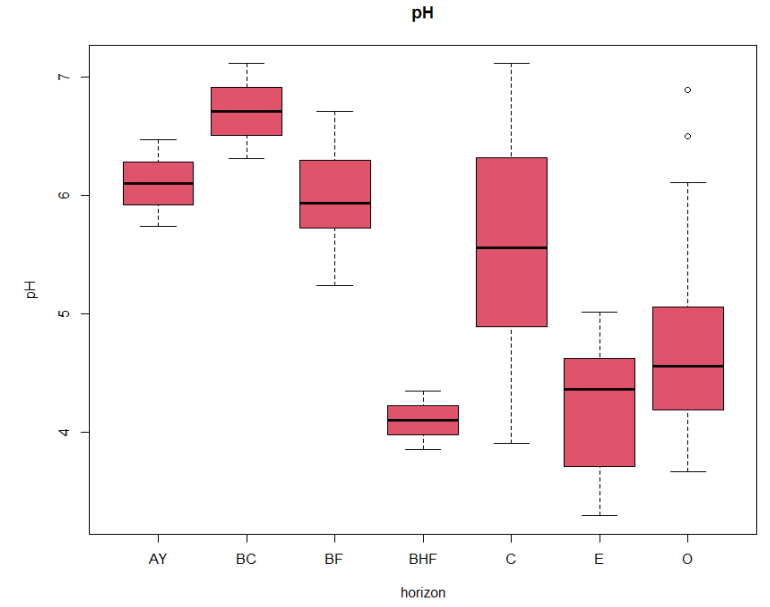

Supplement: s1 [file s1 › Fig_S2.pdf]
